# Supplementary material
Source: Research Square preprint supplement (doi:10.21203/rs.3.rs-9332994/v1)
Supplement: Supplementary file 1 [file 149891ecee4b8c732f70b3ba.pdf]

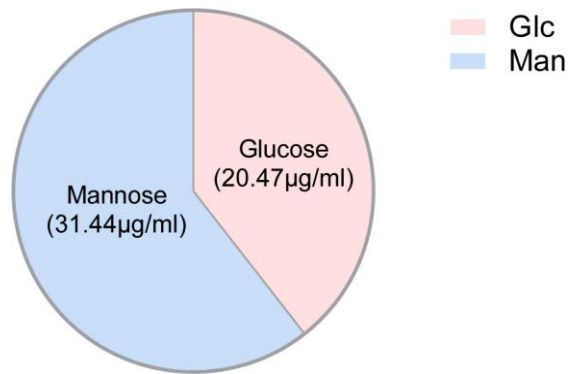

**Figure S1. Monosaccharide composition of BEVs.**

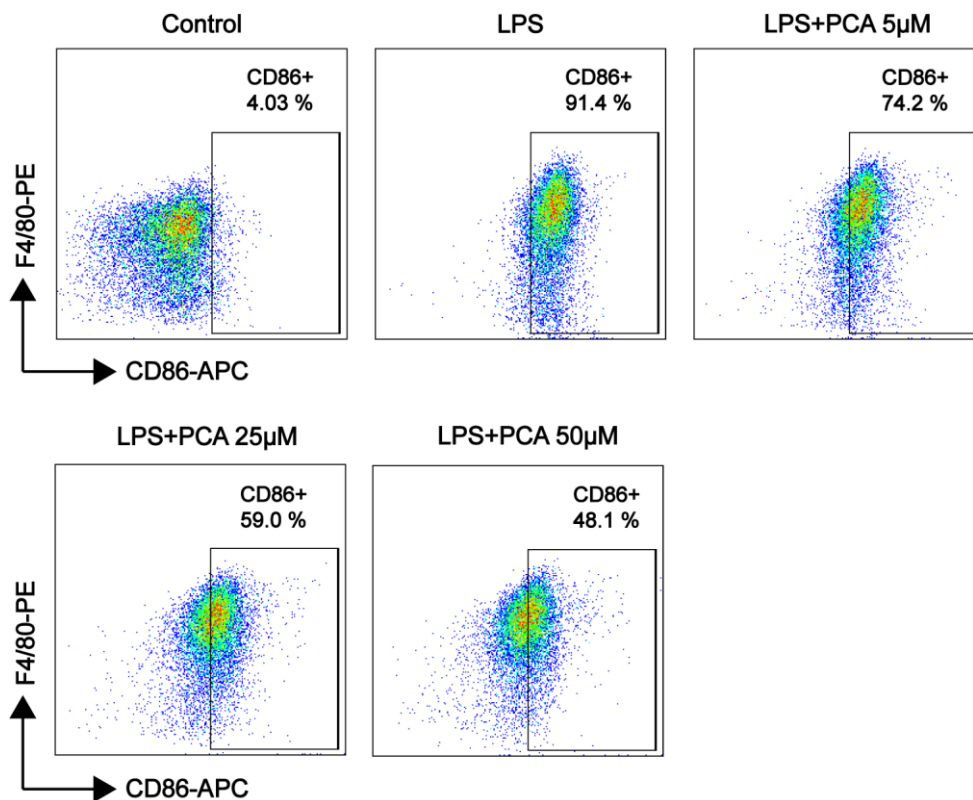

**Figure S2. Flow cytometry analyses of M1 marker CD86 of LPS-treated RAW264.7 cells stimulated by protocatechualdehyde.** Data are presented as means  $\pm$  SD. Statistical analysis was performed using One-way ANOVA analysis followed by Tukey's HSD multiple comparison.

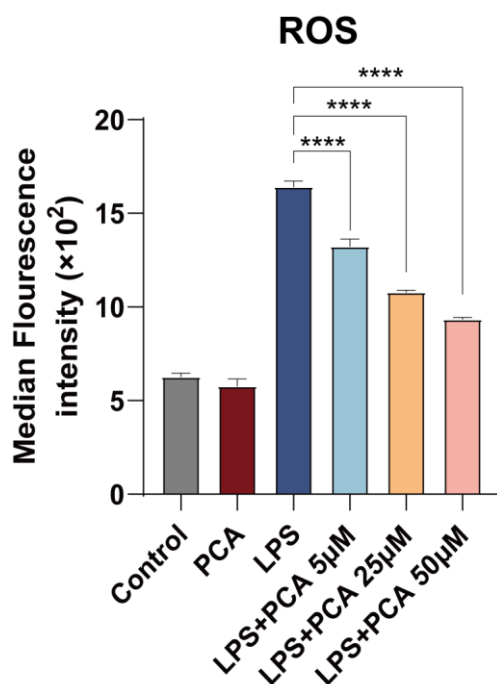

**Figure S3.** Flow cytometric histograms of RAW 264.7 macrophages treated with BEVs showing intracellular ROS (DCFH-DA) signals. Data are presented as means  $\pm$  SD. Statistical analysis was performed using One-way ANOVA analysis followed by Tukey's HSD multiple comparison. \*\*\*\* $p < 0.0001$ .

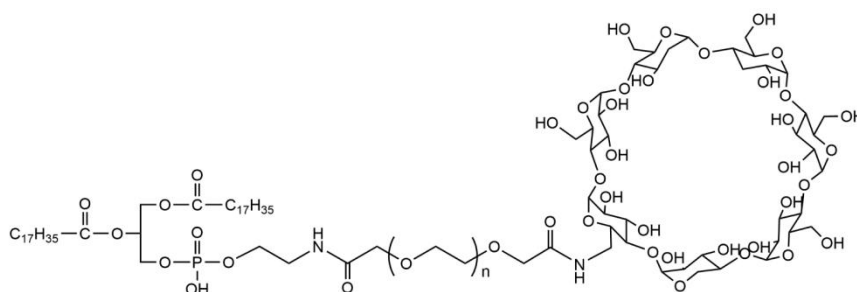

**DSPE-PEG- $\beta$ -CD**

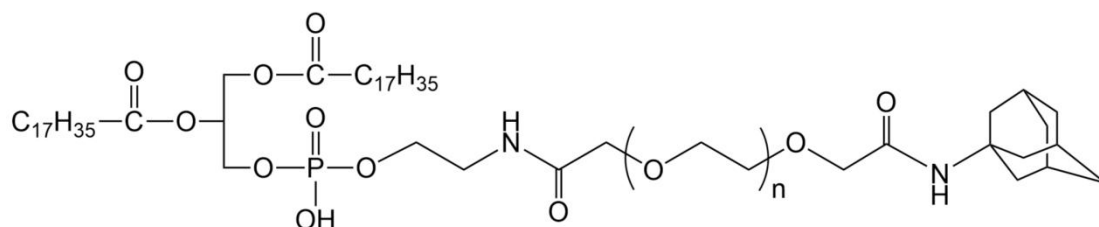

**DSPE-PEG-ADA**

**Figure S4.** The chemical structure of DSPE-PEG- $\beta$ -CD and DSPE-PEG-ADA

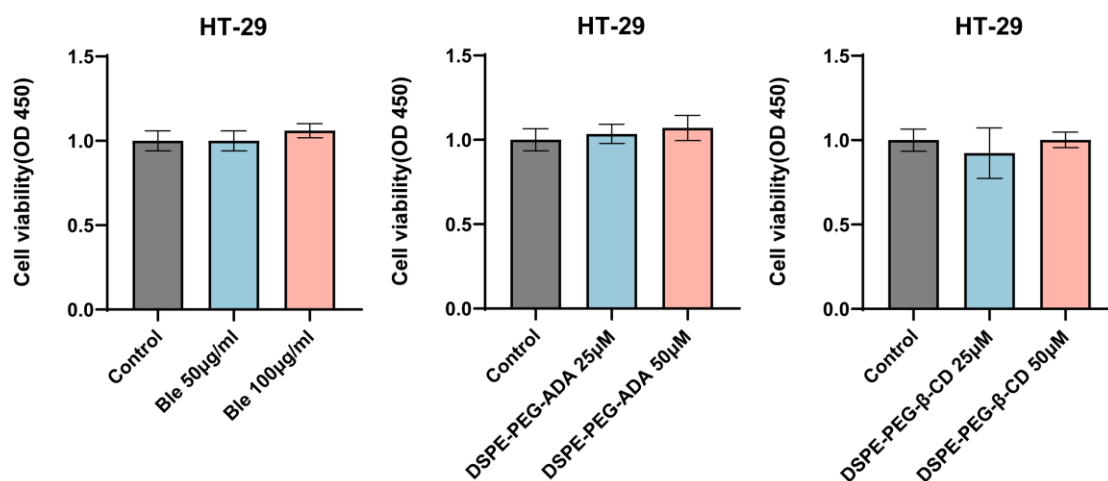

**Figure S5. Cell viability of HT-29 against BEVs, DSPE-PEG-β-CD and DSPE-PEG-ADA.** Cell viability was detected by CCK-8 assay by the absorbance at 450 nm measured after co-incubation for 24 hours. The concentrations of BEVs were 50µg/mL and 100µg/mL. The concentrations of DSPE-PEG-β-CD and DSPE-PEG-ADA were 25µM and 50µM.

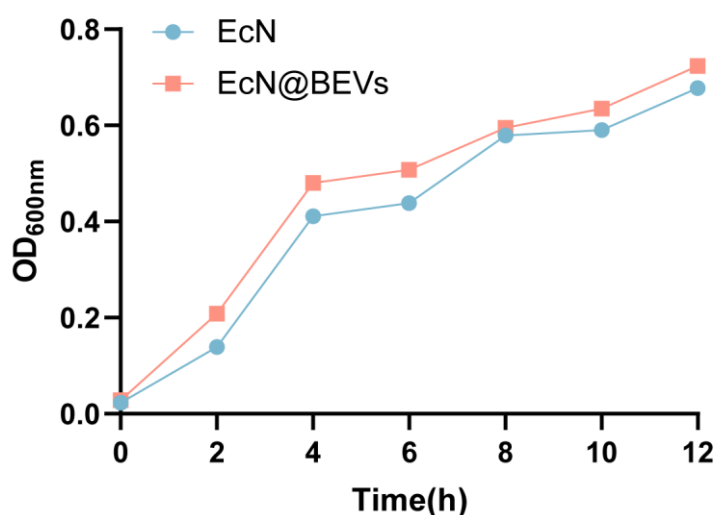

**Figure S6. The growth curves of native EcN and EcN@BEVs.** Bacteria were cultured in LB medium at 37 °C, and the value of OD<sub>600</sub> was recorded in 2h intervals by a microplate reader.

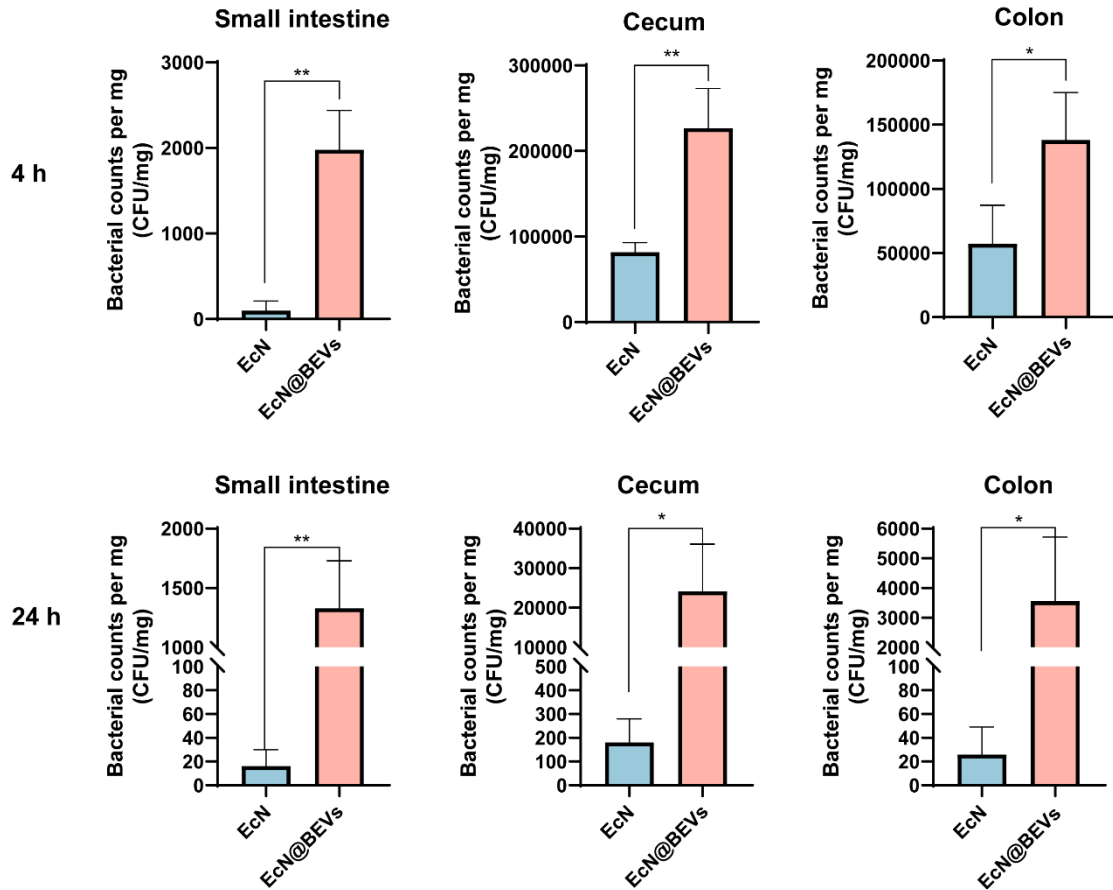

**Figure S7. Bacterial counts of native EcN and EcN@BEVs colonizing at the small intestine, caecum and colon after oral gavage for 4h and 24h.** CFU represented as colony-forming units. Data are presented as means  $\pm$  SD (n = 3). Statistical analysis was performed using Student's t test. \* $p < 0.05$ , \*\* $p < 0.01$ .

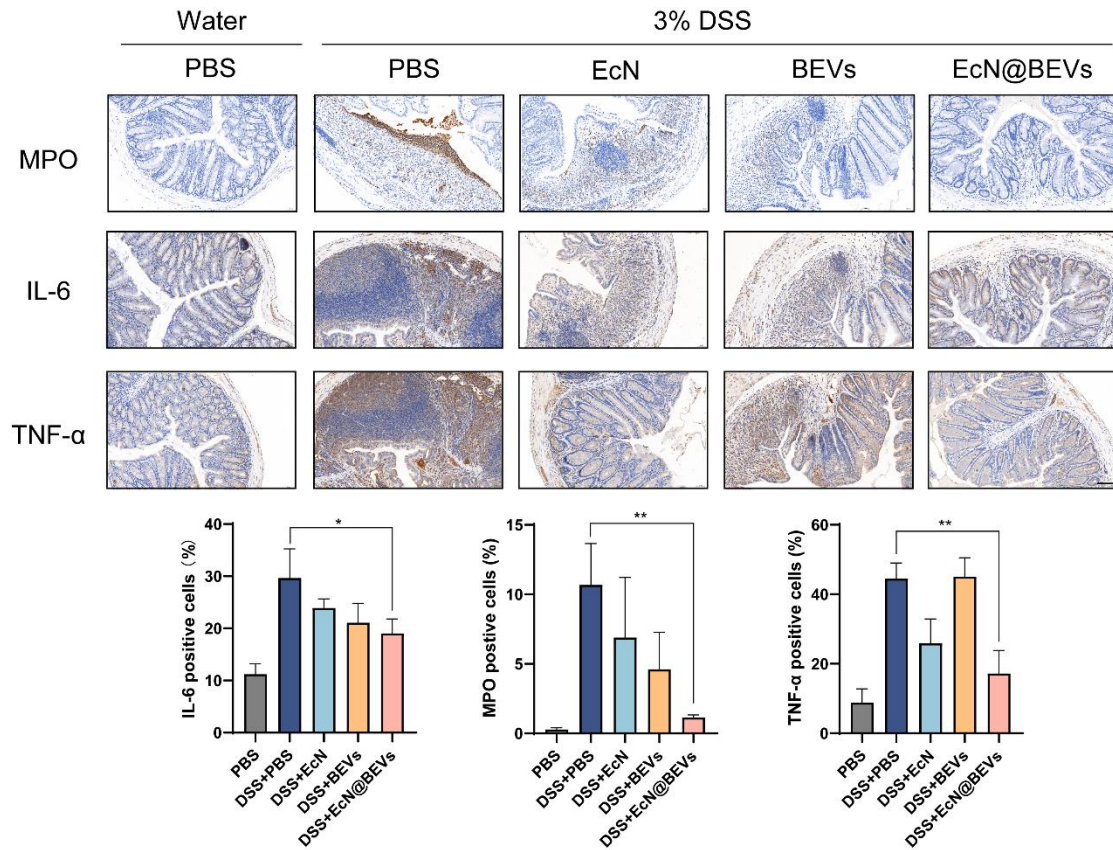

**Figure S8. EcN@BEVs alleviated DSS-triggered immune activation.** Immunohistochemical staining revealing a significant reduction in the number of IL-6, TNF- $\alpha$ , and MPO-positive cells following EcN@BEVs administration. Scale bar: 50  $\mu$ m. Data are presented as means  $\pm$  SD. Statistical analysis was performed using One-way ANOVA analysis followed by Tukey's HSD multiple comparison. \* $p < 0.05$ , \*\* $p < 0.01$ .

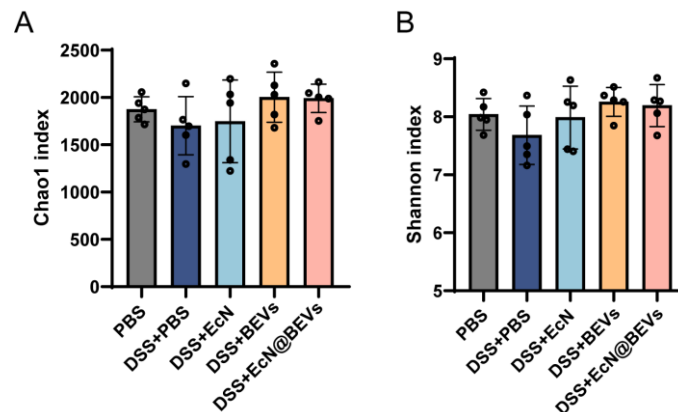

**Figure S9. The  $\alpha$  diversity of the gut microbiota was increased with the treatment of EcN@BEVs.** Comparison of alpha diversity assessed by (A) Chao1 index, (B) Shannon index.

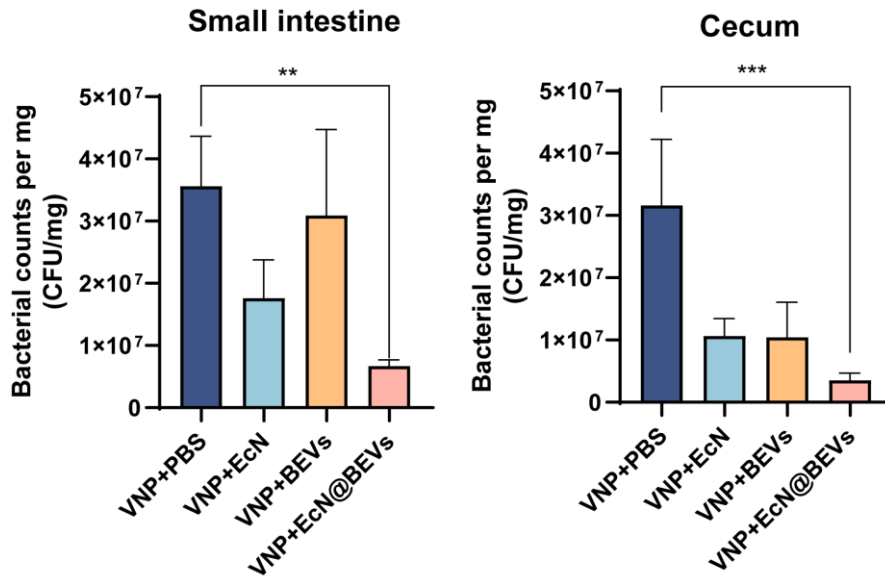

**Figure S10. Quantification of bacterial populations in the small intestine and cecum across treatment groups.** Data are presented as means  $\pm$  SD. Statistical analysis was performed using One-way ANOVA analysis followed by Tukey's HSD multiple comparison. \*\* $p < 0.01$ , \*\*\* $p < 0.001$ .

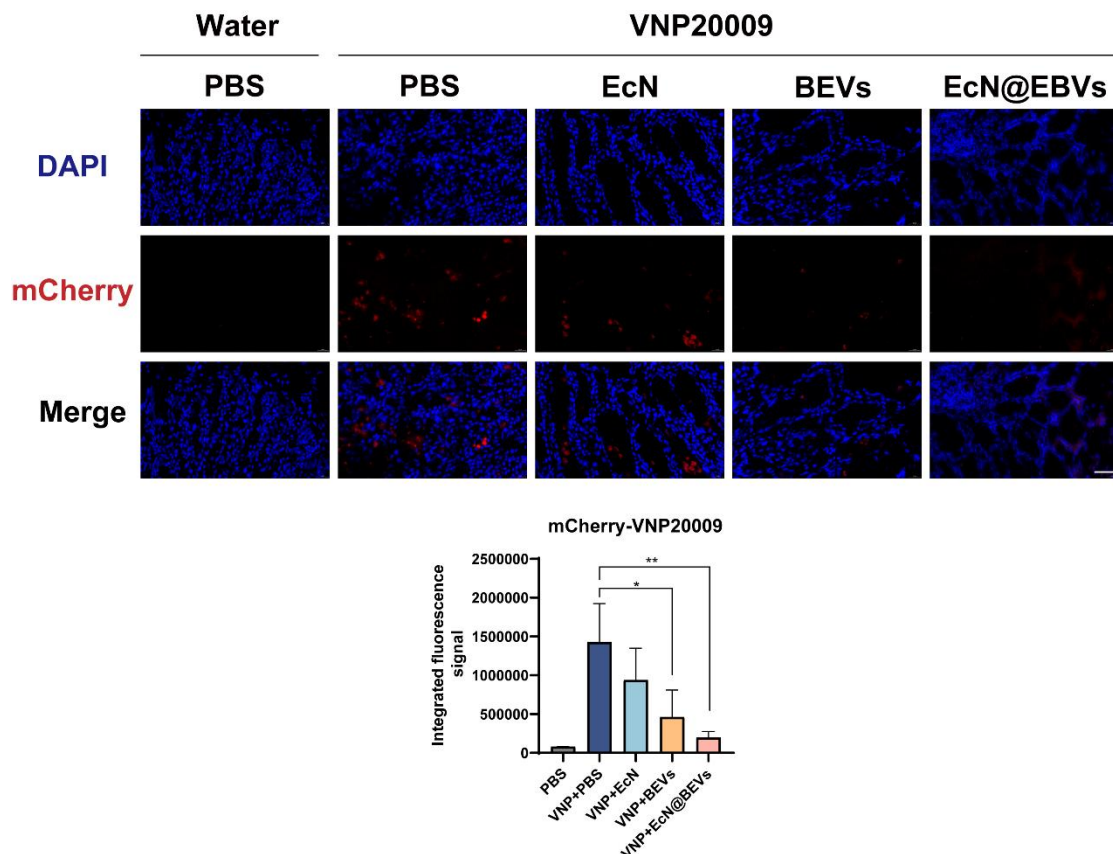

**Figure S11. Representative immunofluorescence images showing VNP20009 with intrinsic red fluorescence in the colon.** Scale bar: 40  $\mu$ m. Data are presented as means  $\pm$  SD. Statistical analysis was performed using One-way ANOVA analysis followed by Tukey's HSD multiple comparison. \* $p < 0.05$ , \*\* $p < 0.01$ .

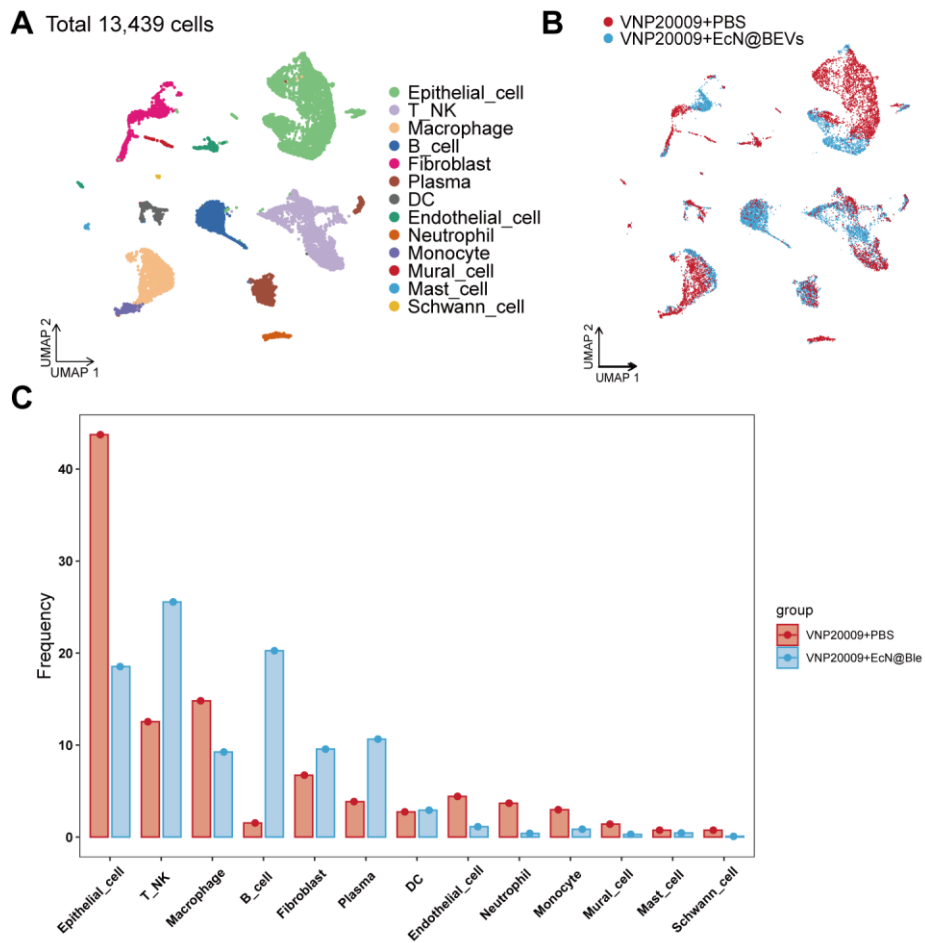

**Figure S12. scRNA-seq analysis of colonic cells from VNP20009-infected mouse and EcN@BEVs-treated mouse (with 13439 total cells from 2 mice). (A)** UMAP plot showing cell compositions of the colons. **(B)** UMAP plot showing cell populations across two samples. **(C)** Column plots of different cell subpopulations in two samples.

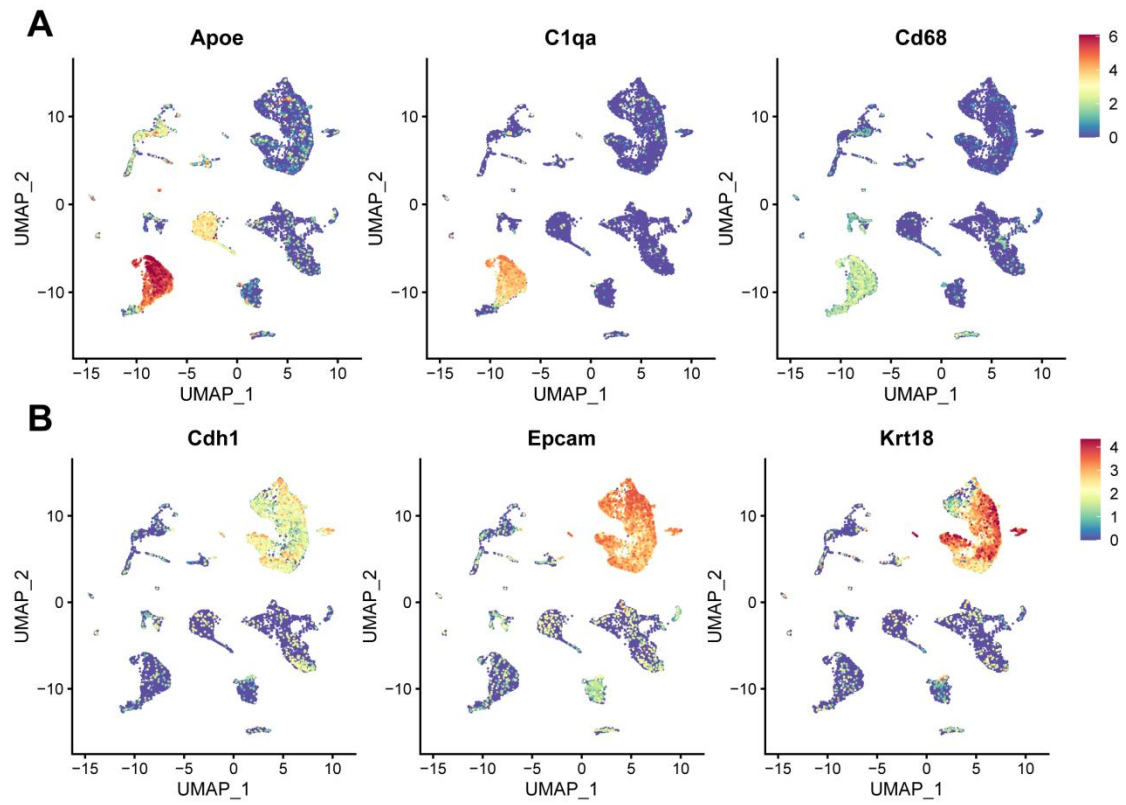

**Figure S13. UMAP plot showing the macrophage markers and the epithelial cell markers. (A) The macrophage markers. (B) The epithelial cell markers.**
